# Supplementary material for: De novo histidine biosynthesis protects Mycobacterium tuberculosis from host IFN-γ mediated histidine starvation
Source: PubMed Central journal article supplement (PMC7994828; doi:10.1038/s42003-021-01926-4), 2021-03-25
Supplement: 42003_2021_1926_MOESM3_ESM.pdf [file 42003_2021_1926_MOESM3_ESM.pdf]

## **Description of Additional Supplementary Files**

**File Name:** Supplementary Data 1

**Description:** List of normalized readcounts

**File Name:** Supplementary Data 2

**Description:** List of differentially expressing genes infected vs uninfected.

**File Name:** Supplementary Data 3

**Description:** GO Immune Functions populated with up and down regulated genes obtained from the RNAseq analysis.

**File Name:** Supplementary Data 4

**Description:** Source data for the graphs presented in Main and Supplementary figures.
